# Supplementary material for: Effect of mixed anions on the physicochemical properties of a sodium containing alkoxyammonium ionic liquid electrolyte
Source: Royal Society of Chemistry journal article supplement (doi:10.1039/c7cp03318d), 2017-01-01
Supplement: c7cp03318d1.pdf [file c7cp03318d1.pdf]

## **Effect of mixed anions on the physicochemical properties of a sodium containing alkoxyammonium ionic liquid electrolyte**

Matthias Hilder<sup>a</sup>, Matthieu Gras<sup>a,b</sup>, Cameron R. Pope<sup>a</sup>, Mega Kar<sup>c</sup>, Douglas R. MacFarlane<sup>c,d</sup>, Maria Forsyth<sup>a,d</sup> and Luke A. O'Dell<sup>a\*</sup>

<sup>a</sup>Institute for Frontier Materials, Deakin University, Geelong Waurm Ponds Campus,  
Victoria 3220, Australia

<sup>b</sup>University of Montpellier, 163 rue Auguste Broussonnet, 34 090 Montpellier, France

<sup>c</sup>School of Chemistry, Monash University, Clayton, Victoria 3800, Australia

<sup>d</sup>ARC Centre of Excellence in Electromaterials Science (ACES), Institute for Frontier  
Materials, Deakin University, Burwood, Victoria 3215, Australia

\*Corresponding author: [luke.odell@deakin.edu.au](mailto:luke.odell@deakin.edu.au)

Figure S1 - Sample densities as a function of Na salt concentration

Figure S2 - Sample viscosities as a function of temperature

Figure S3 - Sample conductivities as a function of temperature

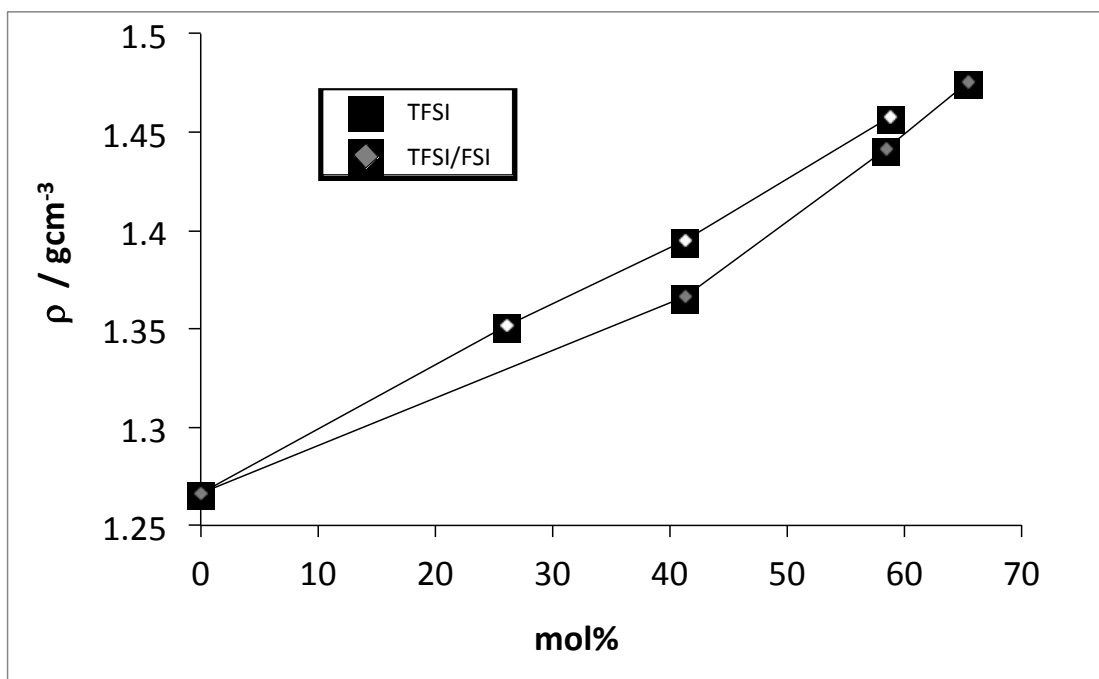

**Figure S1: Densities of the mixtures of  $\text{N}_2(20201)_3\text{TFSI}$  with NaFSI and NaTFSI as a function of the Na salt concentration at 60°C**

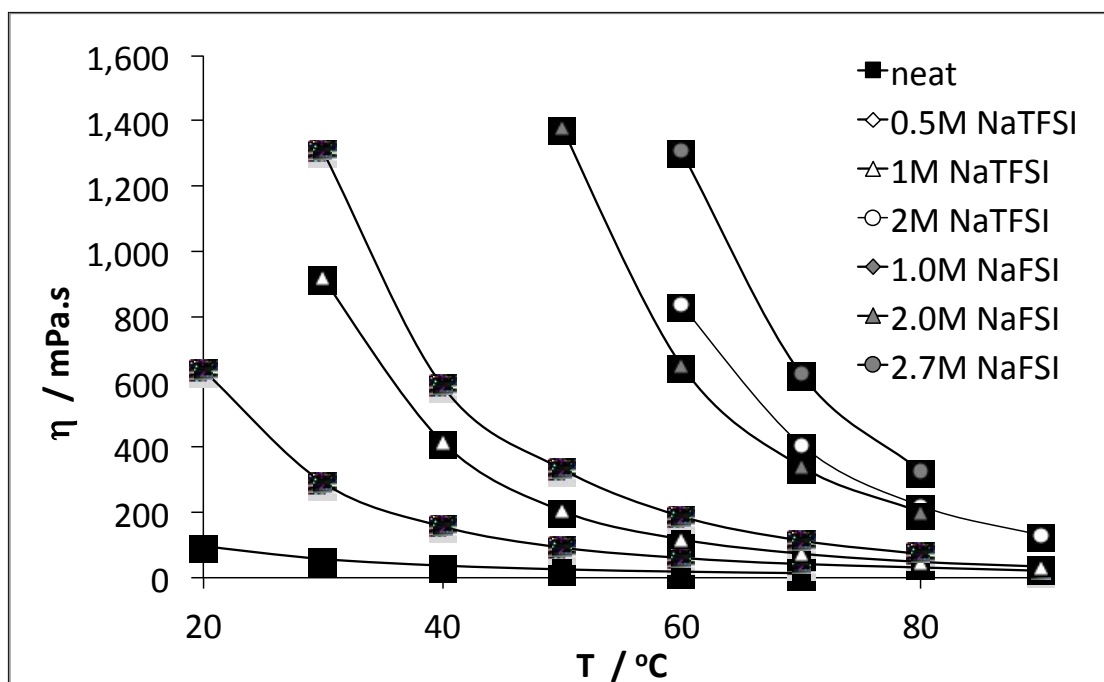

**Figure S2: Dynamic viscosities of pure  $N_{2(20201)3}TFSI$  and of the solutions with NaFSI and NaTFSI as a function of linear temperature.**

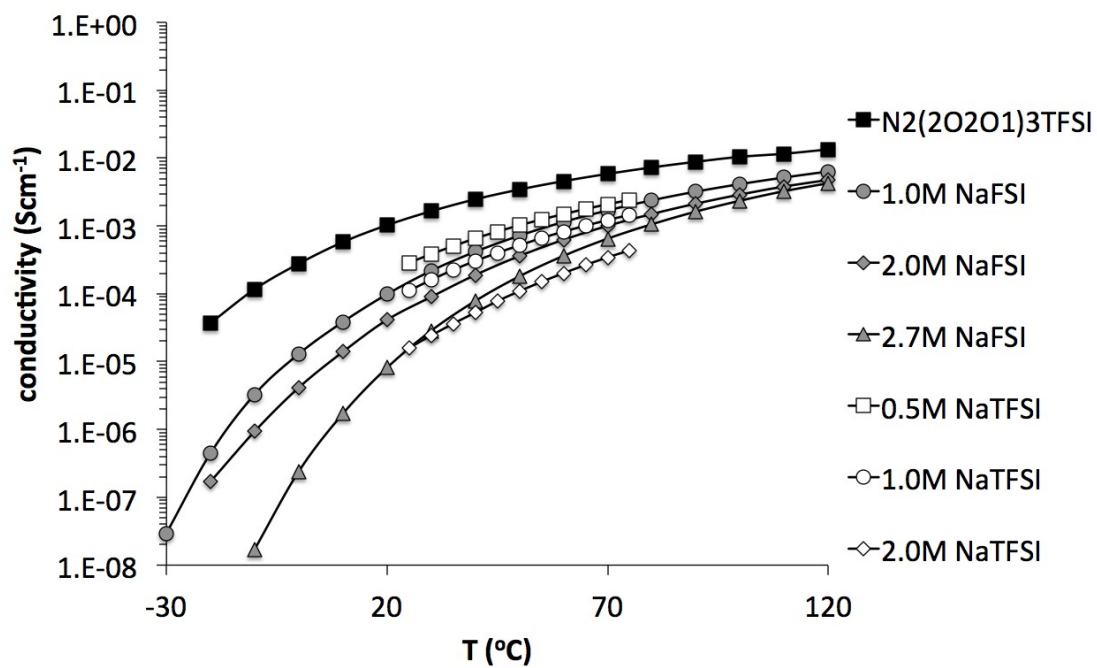

**Figure S3: Conductivities as a function of temperature for the neat IL and their Na solutes**
